# Supplementary material
Source: MDPI journal article supplement (https://www.mdpi.com/search?q=viruses-13-01962)
Supplement: s001 [file viruses-13-01962-s001.zip]

## Sheet: Supplementary Table S4
	Table S4. Comparison of whole genomes (nt) and coding regions (aa) of representation strains of BtCoV HKU10
	Nucleotide or protein	Strains	YN887	YN3723	YN3740	YN4996	YN7345	GX160935	GD141391	GD141402	HN140937	LA7546	LA7549	LA7557	LA7560	LA7565	LA7496	YN2714	YN2727	Ro-HKU10	Hi-HKU10
	genome	YN887
		YN3723	85.9
		YN3740	91.7	89.5
		YN4996	87	96.7	87.9
		YN7345	92.5	88.4	92.2	89.4
		GX160935	93.8	85.6	90.7	86.9	90.9
		GD141391	90.8	85.2	88.6	86.3	89.3	92
		GD141402	90.8	85.2	88.7	86.2	89.2	92	100
		HN140937	87.1	83.8	85.7	84.6	86.4	87.3	87	86.9
		LA7546	86.9	88.8	86.6	89.6	89.4	86.5	86.4	86.4	84.7
		LA7549	85.7	90.8	87.8	89.2	87.6	85.3	85	85	83.8	94.8
		LA7557	85.8	90.3	88.1	88.7	87.9	85.4	85.3	85.3	84	97.3	97.3
		LA7560	85.6	90.7	87.8	89.1	87.5	85.3	84.9	85	83.7	94.8	100	97.3
		LA7565	85.8	90.3	88.1	88.7	87.9	85.4	85.3	85.3	84	97.2	97.3	99.9	97.3
		LA7496	82.8	82.8	82.9	83.2	82.8	82.7	82.7	82.6	81.7	86.9	85.6	86.3	85.6	86.3
		YN2714	72	71.6	71.6	71.9	72	71.8	71.8	71.7	71.6	71.8	71.7	71.5	71.6	71.6	70.4
		YN2727	72	71.7	71.6	72	72	71.8	71.8	71.8	71.7	71.8	71.7	71.6	71.7	71.6	70.4	99
		Ro-HKU10	87.1	83.4	86.7	82.9	85.7	87.9	93.5	93.5	84.7	83.1	83.1	83.4	83.1	83.4	80.4	71.3	71.2
		Hi-HKU10	90.9	85.2	88.5	86.4	88.9	92.1	96.7	96.7	87.1	86.2	85	85.2	85	85.2	82.6	71.8	71.8	92.3
	1ab	YN887
		YN3723	92.7
		YN3740	97.1	93.8
		YN4996	92.6	99.5	93.7
		YN7345	96.2	94.8	96.3	94.8
		GX160935	97.4	92.5	96.6	92.5	95.6
		GD141391	96.2	92.4	95.8	92.4	95	96.4
		GD141402	96.2	92.4	95.8	92.4	95	96.4	100
		HN140937	93.7	91.4	93.3	91.4	93.1	93.8	93.6	93.6
		LA7546	92.6	95.1	93.2	95.1	94.5	92.4	92.4	92.4	91.4
		LA7549	92.8	96.1	93.4	96.1	94.6	92.6	92.5	92.5	91.6	98.5
		LA7557	92.7	95.2	93.4	95.2	94.6	92.5	92.5	92.5	91.6	99.7	98.6
		LA7560	92.8	96.1	93.4	96	94.6	92.6	92.5	92.5	91.6	98.5	99.9	98.6
		LA7565	92.8	95.3	93.4	95.2	94.7	92.6	92.6	92.6	91.6	99.6	98.7	99.9	98.7
		LA7496	91.7	92.2	92.2	92.1	91.6	91.5	91.5	91.5	90.4	94	93.5	94.1	93.4	94.2
		YN2714	79.3	79.5	79.2	79.4	79.4	79.2	79.3	79.3	79	79	79.3	79.2	79.3	79.2	78.5
		YN2727	79.4	79.5	79.4	79.4	79.4	79.4	79.4	79.4	79	79.1	79.3	79.2	79.3	79.3	78.5	98.4
		Ro-HKU10	96.2	92.4	95.8	92.3	94.9	96.4	99.5	99.5	93.6	92.3	92.4	92.4	92.4	92.5	91.5	79.3	79.3
		Hi-HKU10	96	92.1	95.5	92	94.6	96.2	99	99	93.3	92.1	92.2	92.2	92.1	92.3	91.4	79.2	79.2	99
	S	YN887
		YN3723	84.3
		YN3740	84.2	97.6
		YN4996	94.3	86.1	85.6
		YN7345	94	84.7	84.4	93.3
		GX160935	97.2	84.1	84.2	94.3	94
		GD141391	94.4	84.5	84.3	93	96	94.8
		GD141402	94.4	84.5	84.3	93	96	94.8	100
		HN140937	88	80.9	80.8	87.8	87.3	87.5	87.5	87.5
		LA7546	94.2	85.6	85.2	93.9	96.7	94.3	95.6	95.6	87.8
		LA7549	84.8	96.3	95.8	85.7	84.9	84.4	84.8	84.8	81.3	85.9
		LA7557	84.8	96.2	95.8	85.7	84.9	84.4	84.9	84.9	81.4	86.1	99.6
		LA7560	84.9	96.4	95.9	85.8	84.9	84.5	84.8	84.8	81.3	85.9	99.9	99.8
		LA7565	84.7	96	95.6	85.6	84.8	84.3	84.8	84.8	81.3	86	99.4	99.8	99.6
		LA7496	82.4	79.7	79.8	82.9	83.7	82.4	83.1	83.1	80.3	84.3	79.8	80	79.8	79.9
		YN2714	70.5	68.5	68.3	70.7	70.3	70.5	70.3	70.3	70.1	70.8	68.9	69	69	68.9	68.3
		YN2727	70.8	68.8	68.6	70.9	70.6	70.8	70.7	70.7	70.5	71.2	69.2	69.3	69.3	69.2	68.7	98.8
		Ro-HKU10	66.9	70.5	70.7	66.9	67.2	66.7	67.5	67.5	66.3	67.5	70.7	70.7	70.7	70.5	65.8	66.9	67.2
		Hi-HKU10	96	84.3	84.1	93.9	93.3	96.7	95.6	95.6	87.5	93.6	84.6	84.7	84.6	84.6	82	70.4	70.7	66.8
	orf3a	YN887
		YN3723	98.5
		YN3740	98.9	99.6
		YN4996	98.1	99.6	99.3
		YN7345	98.5	99.3	99.6	98.9
		GX160935	97.8	98.5	98.9	98.1	98.5
		GD141391	98.5	99.3	98.9	99.3	98.5	97.8
		GD141402	98.5	99.3	98.9	99.3	98.5	97.8	100
		HN140937	96.3	97	96.7	97	96.3	95.6	97.8	97.8
		LA7546	98.9	99.6	100	99.3	99.6	98.9	98.9	98.9	96.7
		LA7549	98.5	100	99.6	99.6	99.3	98.5	99.3	99.3	97	99.6
		LA7557	98.5	99.3	99.6	98.9	99.3	98.5	98.5	98.5	96.3	99.6	99.3
		LA7560	98.5	100	99.6	99.6	99.3	98.5	99.3	99.3	97	99.6	100	99.3
		LA7565	98.5	99.3	99.6	98.9	99.3	98.5	98.5	98.5	96.3	99.6	99.3	100	99.3
		LA7496	77	76.7	76.7	76.3	76.7	75.9	76.7	76.7	76.7	76.7	76.7	76.3	76.7	76.3
		YN2714	77.4	77	77.4	77	77	77	77.8	77.8	78.5	77.4	77	77.4	77	77.4	65.6
		YN2727	77.4	77	77.4	77	77	77	77.8	77.8	78.5	77.4	77	77.4	77	77.4	65.6	100
		Ro-HKU10	98.5	99.3	98.9	99.6	98.5	97.8	99.6	99.6	97.4	98.9	99.3	98.5	99.3	98.5	76.7	77.4	77.4
		Hi-HKU10	98.1	98.9	98.5	98.5	98.1	97.4	98.9	98.9	97.4	98.5	98.9	98.1	98.9	98.1	76.7	77.4	77.4	99.3
	E	YN887
		YN3723	98.8
		YN3740	98.8	100
		YN4996	97.6	98.8	98.8
		YN7345	98.8	100	100	98.8
		GX160935	98.8	97.6	97.6	96.3	97.6
		GD141391	98.8	97.6	97.6	96.3	97.6	100
		GD141402	98.8	97.6	97.6	96.3	97.6	100	100
		HN140937	97.6	98.8	98.8	97.6	98.8	98.8	98.8	98.8
		LA7546	98.8	100	100	98.8	100	97.6	97.6	97.6	98.8
		LA7549	98.8	100	100	98.8	100	97.6	97.6	97.6	98.8	100
		LA7557	98.8	100	100	98.8	100	97.6	97.6	97.6	98.8	100	100
		LA7560	98.8	100	100	98.8	100	97.6	97.6	97.6	98.8	100	100	100
		LA7565	98.8	100	100	98.8	100	97.6	97.6	97.6	98.8	100	100	100	100
		LA7496	92.7	93.9	93.9	92.7	93.9	91.5	91.5	91.5	92.7	93.9	93.9	93.9	93.9	93.9
		YN2714	79.3	78	78	76.8	78	80.5	80.5	80.5	79.3	78	78	78	78	78	76.8
		YN2727	79.3	78	78	76.8	78	80.5	80.5	80.5	79.3	78	78	78	78	78	76.8	100
		Ro-HKU10	97.6	98.8	98.8	97.6	98.8	98.8	98.8	98.8	100	98.8	98.8	98.8	98.8	98.8	92.7	79.3	79.3
		Hi-HKU10	97.6	98.8	98.8	97.6	98.8	98.8	98.8	98.8	100	98.8	98.8	98.8	98.8	98.8	92.7	79.3	79.3	100
	M	YN887
		YN3723	98.5
		YN3740	98.5	100
		YN4996	98.9	99.6	99.6
		YN7345	98.9	98.5	98.5	98.9
		GX160935	94.1	94.1	94.1	94.4	94.1
		GD141391	93.7	93.7	93.7	94.1	93.7	99.3
		GD141402	93.7	93.7	93.7	94.1	93.7	99.3	100
		HN140937	92.6	93.7	93.7	93.7	92.9	97	97.8	97.8
		LA7546	98.5	99.3	99.3	99.6	98.5	94.1	93.7	93.7	93.3
		LA7549	96.3	95.9	95.9	96.3	96.3	91.1	91.4	91.4	91.1	95.9
		LA7557	98.5	99.3	99.3	99.6	98.5	94.1	93.7	93.7	93.3	100	95.9
		LA7560	96.3	95.9	95.9	96.3	96.3	91.1	91.4	91.4	91.1	95.9	100	95.9
		LA7565	98.5	99.3	99.3	99.6	98.5	94.1	93.7	93.7	93.3	100	95.9	100	95.9
		LA7496	96.3	95.9	95.9	96.3	96.3	93.7	94.1	94.1	93.3	95.9	95.2	95.9	95.2	95.9
		YN2714	85.5	85.1	85.1	85.5	85.1	86.2	86.6	86.6	85.9	85.5	88.5	85.5	88.5	85.5	86.6
		YN2727	85.5	85.1	85.1	85.5	85.1	86.2	86.6	86.6	85.9	85.5	88.5	85.5	88.5	85.5	86.6	100
		Ro-HKU10	92.9	94.4	94.4	94.1	93.3	98.5	99.3	99.3	98.1	93.7	91.1	93.7	91.1	93.7	93.7	86.2	86.2
		Hi-HKU10	90.3	90.7	90.7	91.1	90.7	95.9	96.7	96.7	95.2	90.7	93.3	90.7	93.3	90.7	91.8	88.8	88.8	96.3
	N	YN887
		YN3723	98.5
		YN3740	98.5	100
		YN4996	98.9	99.6	99.6
		YN7345	98.9	98.5	98.5	98.9
		GX160935	94.1	94.1	94.1	94.4	94.1
		GD141391	93.7	93.7	93.7	94.1	93.7	99.3
		GD141402	93.7	93.7	93.7	94.1	93.7	99.3	100
		HN140937	92.6	93.7	93.7	93.7	92.9	97	97.8	97.8
		LA7546	98.5	99.3	99.3	99.6	98.5	94.1	93.7	93.7	93.3
		LA7549	96.3	95.9	95.9	96.3	96.3	91.1	91.4	91.4	91.1	95.9
		LA7557	98.5	99.3	99.3	99.6	98.5	94.1	93.7	93.7	93.3	100	95.9
		LA7560	96.3	95.9	95.9	96.3	96.3	91.1	91.4	91.4	91.1	95.9	100	95.9
		LA7565	98.5	99.3	99.3	99.6	98.5	94.1	93.7	93.7	93.3	100	95.9	100	95.9
		LA7496	96.3	95.9	95.9	96.3	96.3	93.7	94.1	94.1	93.3	95.9	95.2	95.9	95.2	95.9
		YN2714	85.5	85.1	85.1	85.5	85.1	86.2	86.6	86.6	85.9	85.5	88.5	85.5	88.5	85.5	86.6
		YN2727	85.5	85.1	85.1	85.5	85.1	86.2	86.6	86.6	85.9	85.5	88.5	85.5	88.5	85.5	86.6	100
		Ro-HKU10	92.9	94.4	94.4	94.1	93.3	98.5	99.3	99.3	98.1	93.7	91.1	93.7	91.1	93.7	93.7	86.2	86.2
		Hi-HKU10	90.3	90.7	90.7	91.1	90.7	95.9	96.7	96.7	95.2	90.7	93.3	90.7	93.3	90.7	91.8	88.8	88.8	96.3
	orf7a	YN887
		YN3723	78.6
		YN3740	59.5	56
		YN4996	57.1	52.4	94
		YN7345	92.9	77.4	56	53.6
		GX160935	58.3	60.7	79.8	76.2	56
		GD141391	57.1	59.5	81	77.4	54.8	96.4
		GD141402	57.1	59.5	81	77.4	54.8	96.4	100
		HN140937	70.2	73.8	57.1	53.6	73.8	60.7	59.5	59.5
		LA7546	78.6	92.9	59.5	56	75	58.3	59.5	59.5	71.4
		LA7549	79.8	94	59.5	56	76.2	58.3	59.5	59.5	72.6	98.8
		LA7557	78.6	92.9	59.5	56	75	58.3	59.5	59.5	71.4	100	98.8
		LA7560	79.8	94	59.5	56	76.2	58.3	59.5	59.5	72.6	98.8	100	98.8
		LA7565	78.6	92.9	59.5	56	75	58.3	59.5	59.5	71.4	100	98.8	100	98.8
		LA7496	50	48.8	50	52.4	51.2	52.4	52.4	52.4	51.2	45.2	46.4	45.2	46.4	45.2
		YN2714	35.7	34.5	36.9	35.7	34.5	44	42.9	42.9	36.9	32.1	33.3	32.1	33.3	32.1	36.9
		YN2727	35.7	34.5	36.9	35.7	34.5	44	42.9	42.9	36.9	32.1	33.3	32.1	33.3	32.1	36.9	98.8
		Ro-HKU10	85.7	73.8	57.1	56	84.5	61.9	59.5	59.5	64.3	72.6	73.8	72.6	73.8	72.6	51.2	35.7	35.7
		Hi-HKU10	60.7	59.5	82.1	78.6	57.1	95.2	96.4	96.4	58.3	60.7	60.7	60.7	60.7	60.7	53.6	45.2	45.2	61.9
	orf7b	YN887
		YN3723	78.3
		YN3740	79.5	96.3
		YN4996	78.9	97.5	96.3
		YN7345	87	90.7	89.4	91.3
		GX160935	90.7	83.9	83.2	83.2	88.8
		GD141391	88.2	83.9	82.6	83.2	87	90.1
		GD141402	88.2	83.9	82.6	83.2	87	90.1	100
		HN140937	87	76.4	76.4	75.8	82	85.7	88.8	88.8
		LA7546	64	62.1	62.1	63.4	65.2	61.5	61.5	61.5	60.2
		LA7549	64	62.1	62.1	63.4	65.2	61.5	61.5	61.5	60.2	100
		LA7557	62.7	62.7	62.7	64	65.8	61.5	61.5	61.5	60.2	98.8	98.8
		LA7560	63.4	62.7	62.7	64	65.8	62.1	62.1	62.1	60.2	99.4	99.4	99.4
		LA7565	62.7	62.7	62.7	64	65.8	61.5	61.5	61.5	60.2	98.8	98.8	100	99.4
		LA7496	—	—	—	—	—	—	—	—	—	—	—	—	—	—
		YN2714	23.6	21.1	21.7	22.4	21.7	24.2	23.6	23.6	24.2	24.2	24.2	24.2	24.2	24.2	—
		YN2727	24.8	22.4	23	23.6	23	25.5	24.8	24.8	26.1	23.6	23.6	23.6	23.6	23.6	—	96.9
		Ro-HKU10	86.3	82.6	81.4	83.2	86.3	87.6	96.3	96.3	87	60.9	60.9	61.5	61.5	61.5	—	24.2	25.5
		Hi-HKU10	87.6	81.4	80.1	82	85.7	87	93.8	93.8	86.3	64.6	64.6	63.4	64	63.4	—	23.6	24.2	94.4
	orf7c	YN887
		YN3723	—
		YN3740	—	97.8
		YN4996	—	—	—
		YN7345	—	—	—	—
		GX160935	—	56.5	57.6	—	—
		GD141391	—	54.3	48.9	—	—	48.9
		GD141402	—	54.3	48.9	—	—	48.9	100
		HN140937	—	55.4	41.3	—	—	41.3	73.9	73.9
		LA7546	—	—	—	—	—	—	—	—	—
		LA7549	—	—	—	—	—	—	—	—	—	—
		LA7557	—	—	—	—	—	—	—	—	—	—	—
		LA7560	—	—	—	—	—	—	—	—	—	—	—	—
		LA7565	—	—	—	—	—	—	—	—	—	—	—	—	—
		LA7496	—	—	—	—	—	—	—	—	—	—	—	—	—	—
		YN2714	—	—	—	—	—	—	—	—	—	—	—	—	—	—	—
		YN2727	—	—	—	—	—	—	—	—	—	—	—	—	—	—	—	—
		Ro-HKU10	—	52.2	48.9	—	—	48.9	92.4	—	72.8	—	—	—	—	—	—	—	—
		Hi-HKU10	—	56.5	50	—	—	50	88	—	80.4	—	—	—	—	—	—	—	—	90.2
