# Supplementary material
Source: MDPI journal article supplement (https://www.mdpi.com/search?q=viruses-13-01962)
Supplement: s001 [file viruses-13-01962-s001.zip]

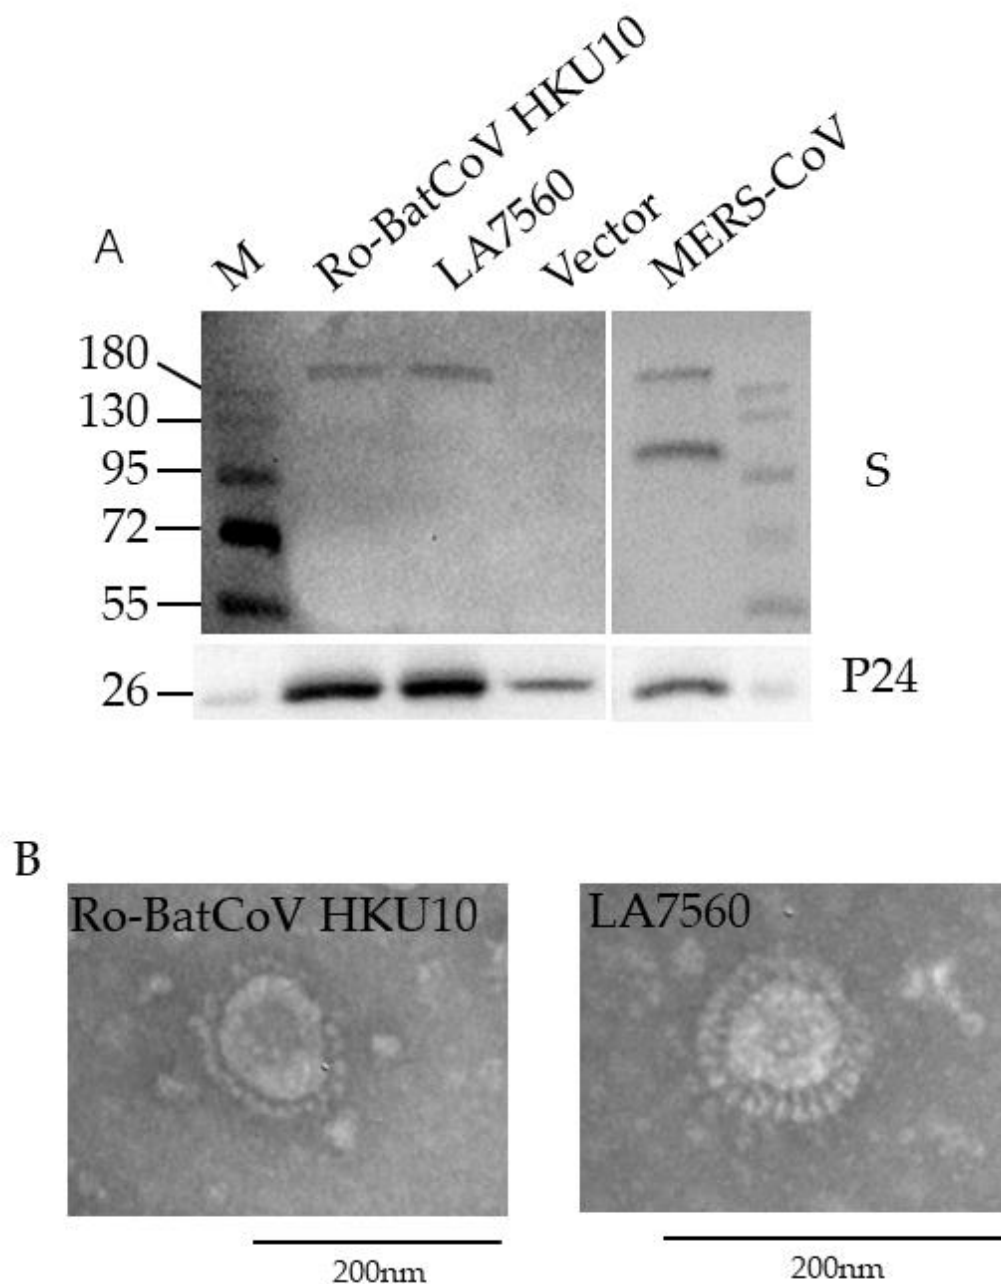

**Figure S1.** Characterization of BatCoV HKU10 spike mediated pseudovirus. **(A)** Western blot analysis of the protein expression of pseudoviruses in the medium supernatant. **(B)** Electron-microscopical observation of negative-stain coronavirus particles. The bars represent 200nm.

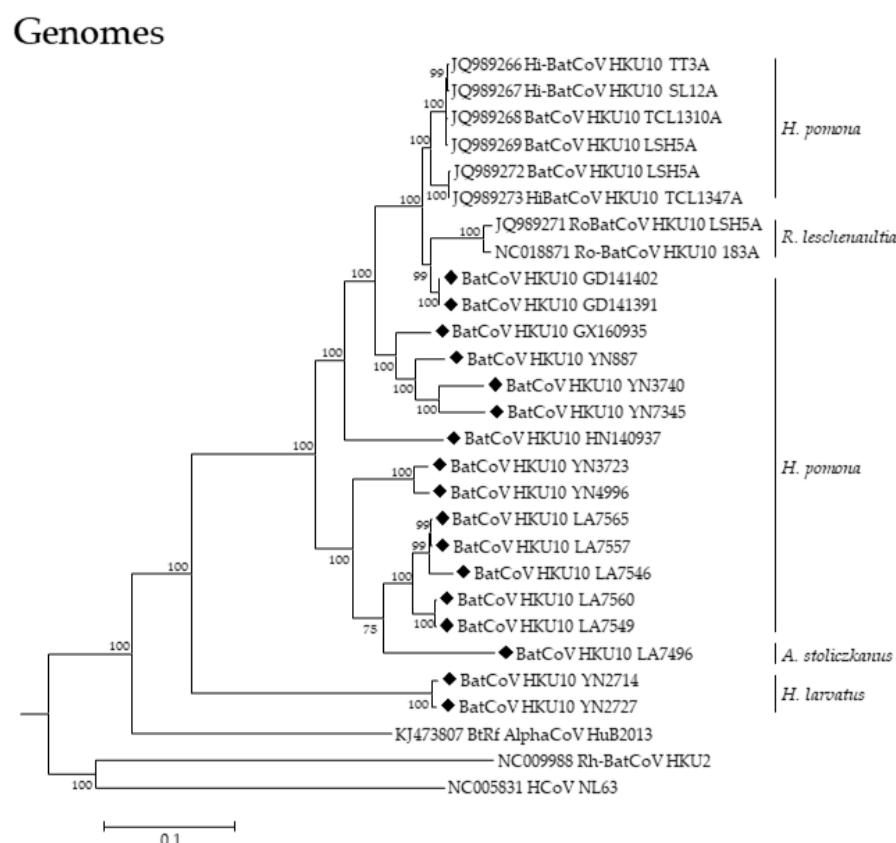

**Figure S2.** Phylogenetic tree of BatCoV HKU10. The tree was constructed using genomes with 5' and 3' UTR removed based on maximum likelihood method, with bootstrap value of 1000 replicates. The scale bar indicates the estimated number of substitutions per 10 nucleotides. Filled diamonds indicate viruses detected in this study.

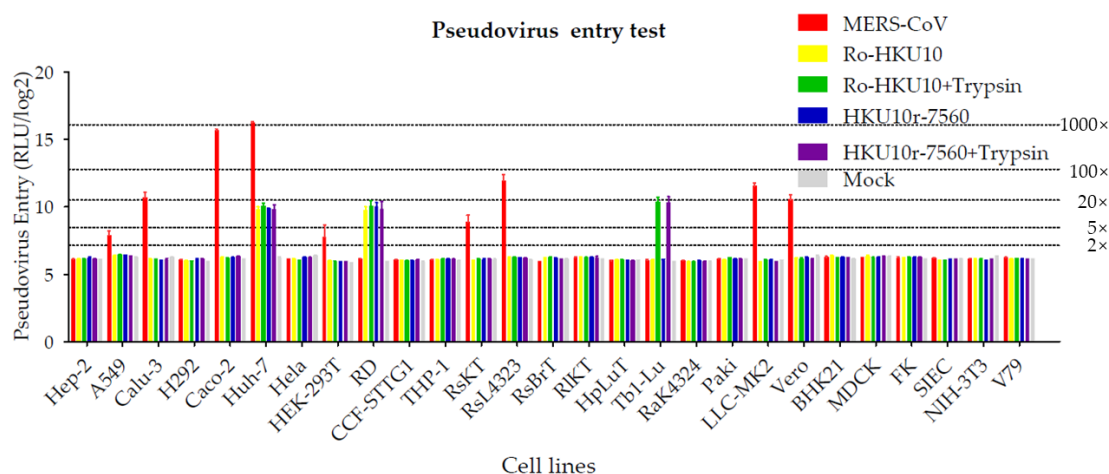

**Figure S3.** HKU10 spike-mediated pseudovirus entry. Ro-BtCoV HKU10, LA7560, and MERS-CoV spike-mediated pseudovirus were produced to screen their cell tropism. For Trypsin treatment, pseudoviruses were incubated with 50 µg/mL TPCK-treated trypsin at room temperature for 10 min, and then add 50 µg/mL soybean trypsin inhibitor to stop the reactions. Trypsin treated or untreated pseudoviruses were added to cells and incubated. 48h post infection, cells were lysed and luciferase were detected.
